# Supplementary material
Source: PubMed Central journal article supplement (PMC1299032)
Supplement: 5-7400121s2.pdf [file 5-7400121s2.pdf]

# Supplementary Figure 2

## A

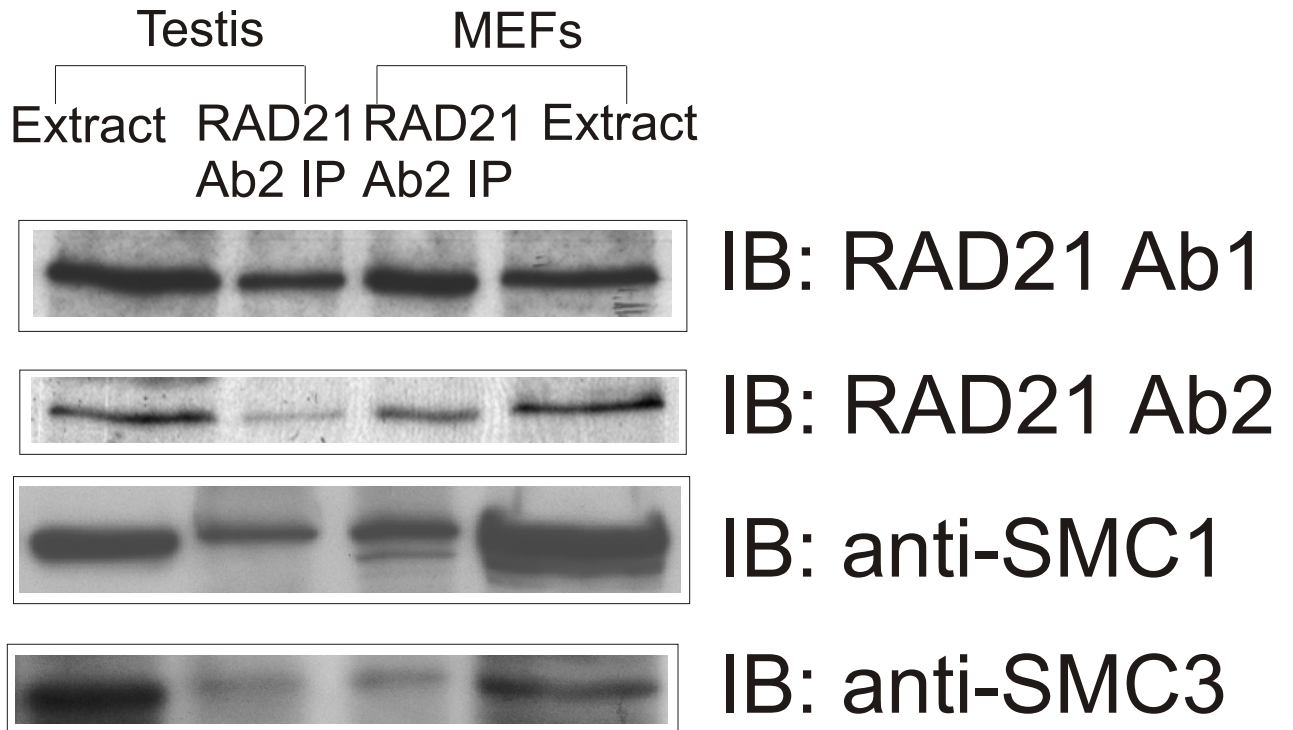

## B

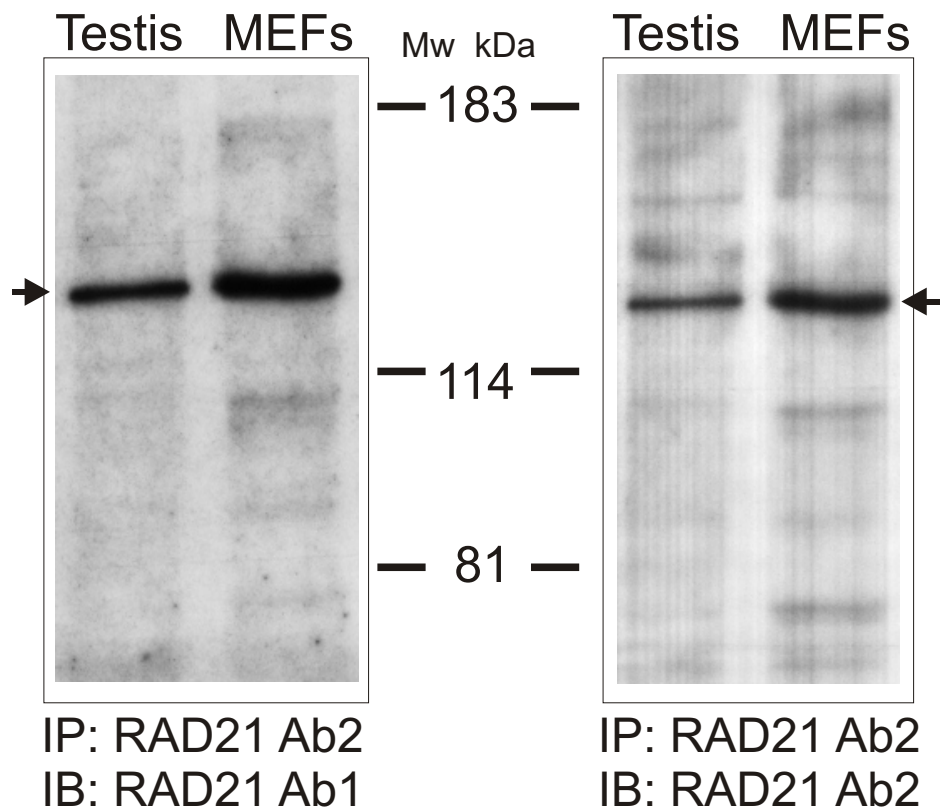

**Supplementary Fig. 2** | Immunoprecipitation capability of RAD21/SCC1 antibodies. **(A)** Immunoprecipitation of RAD21/SCC1 from testicular and somatic cells was performed using RAD21 Ab2. The presence of RAD21 in the immunoprecipitants was verified by immunoblot analysis using both RAD21 Ab1 and RAD21 Ab2. The presence of SMC1 in the total protein extract and precipitated proteins was detected with an antibody against SMC1, which recognizes both SMC1*a* and SMC1*b*. The size difference between the two SMC1 proteins could not be resolved on this blot. A parallel blot was probed with anti-SMC3 antibody to verify the presence of SMC3. **(B)** Western blots of RAD21 Ab2 immunoprecipitates from testis and MEFs. Neither of the antibodies reacts with any additional bands of 80–100 kDa from testis, which may represent REC8. MEFs: mouse embryonic fibroblasts; IP: immunoprecipitate; IB: immunoblot.
