# Supplementary material
Source: PubMed Central journal article supplement (PMC1299032)
Supplement: 5-7400121s3.pdf [file 5-7400121s3.pdf]

# Supplementary Figure 3

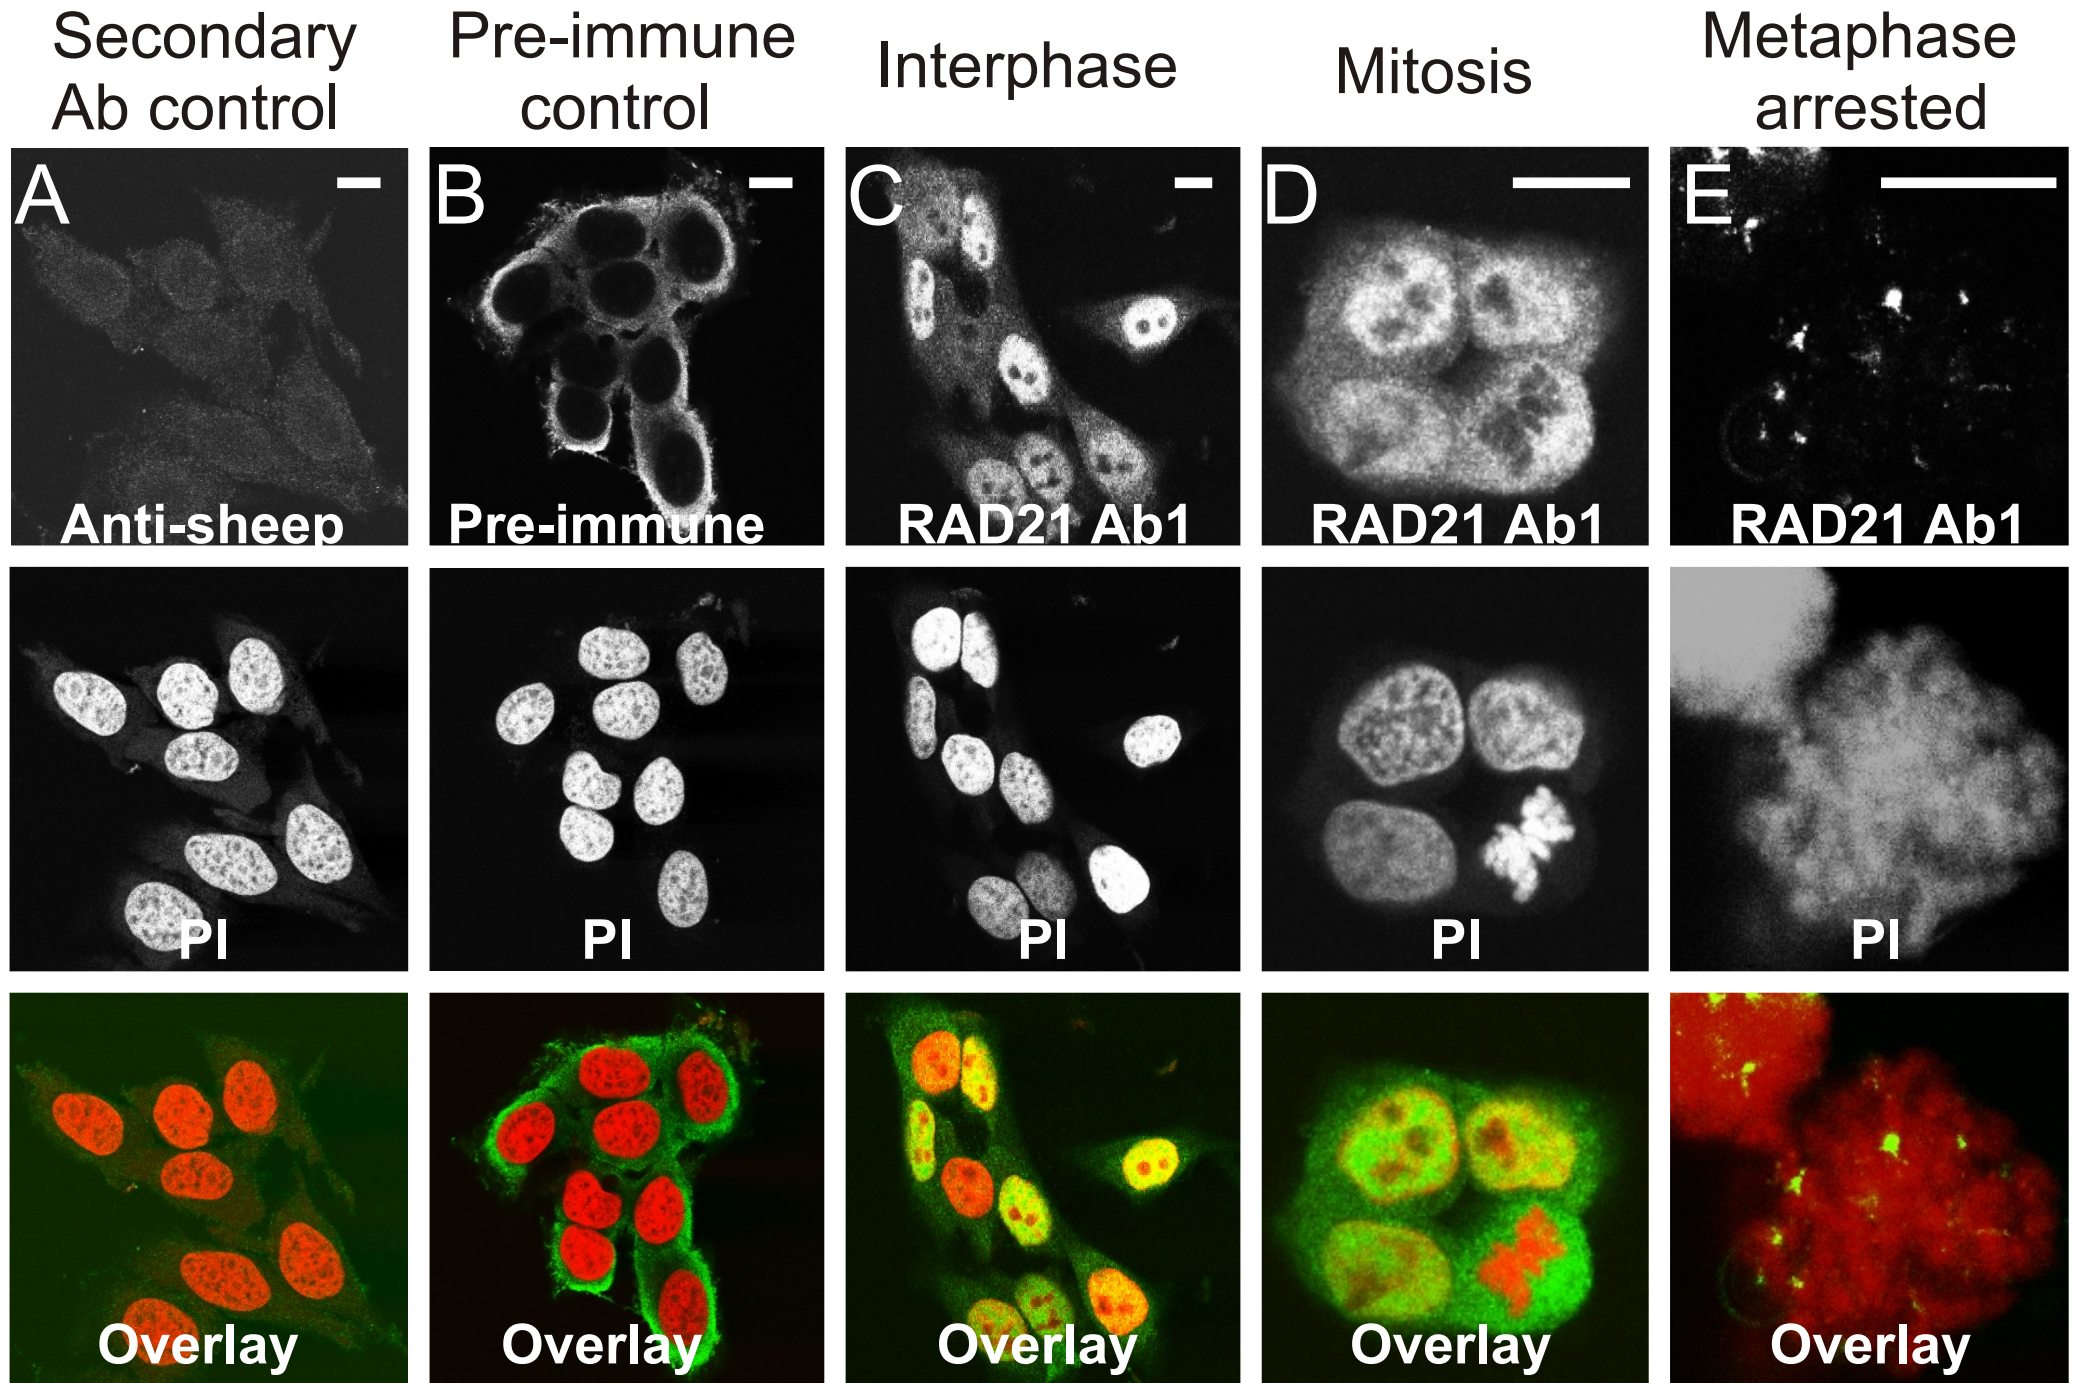

**Supplementary Fig. 3** | Immunostaining of HeLa cells using RAD21 Ab1. Nuclei were counter-stained with PI (red). Controls were performed by omitting primary antibody (**A**) and using pre-immune sera (**B**). The staining of RAD21 Ab1 (green) was examined in interphase (**C**), mitotic (**D**) and metaphase-arrested cells (**E**). Note the patchy staining (yellow) on metaphase-like chromosomes in (**E**). Bar = 10  $\mu$ m.
