# Supplementary material
Source: PubMed Central journal article supplement (PMC1299032)
Supplement: 5-7400121s4.pdf [file 5-7400121s4.pdf]

Supplementary Figure 4

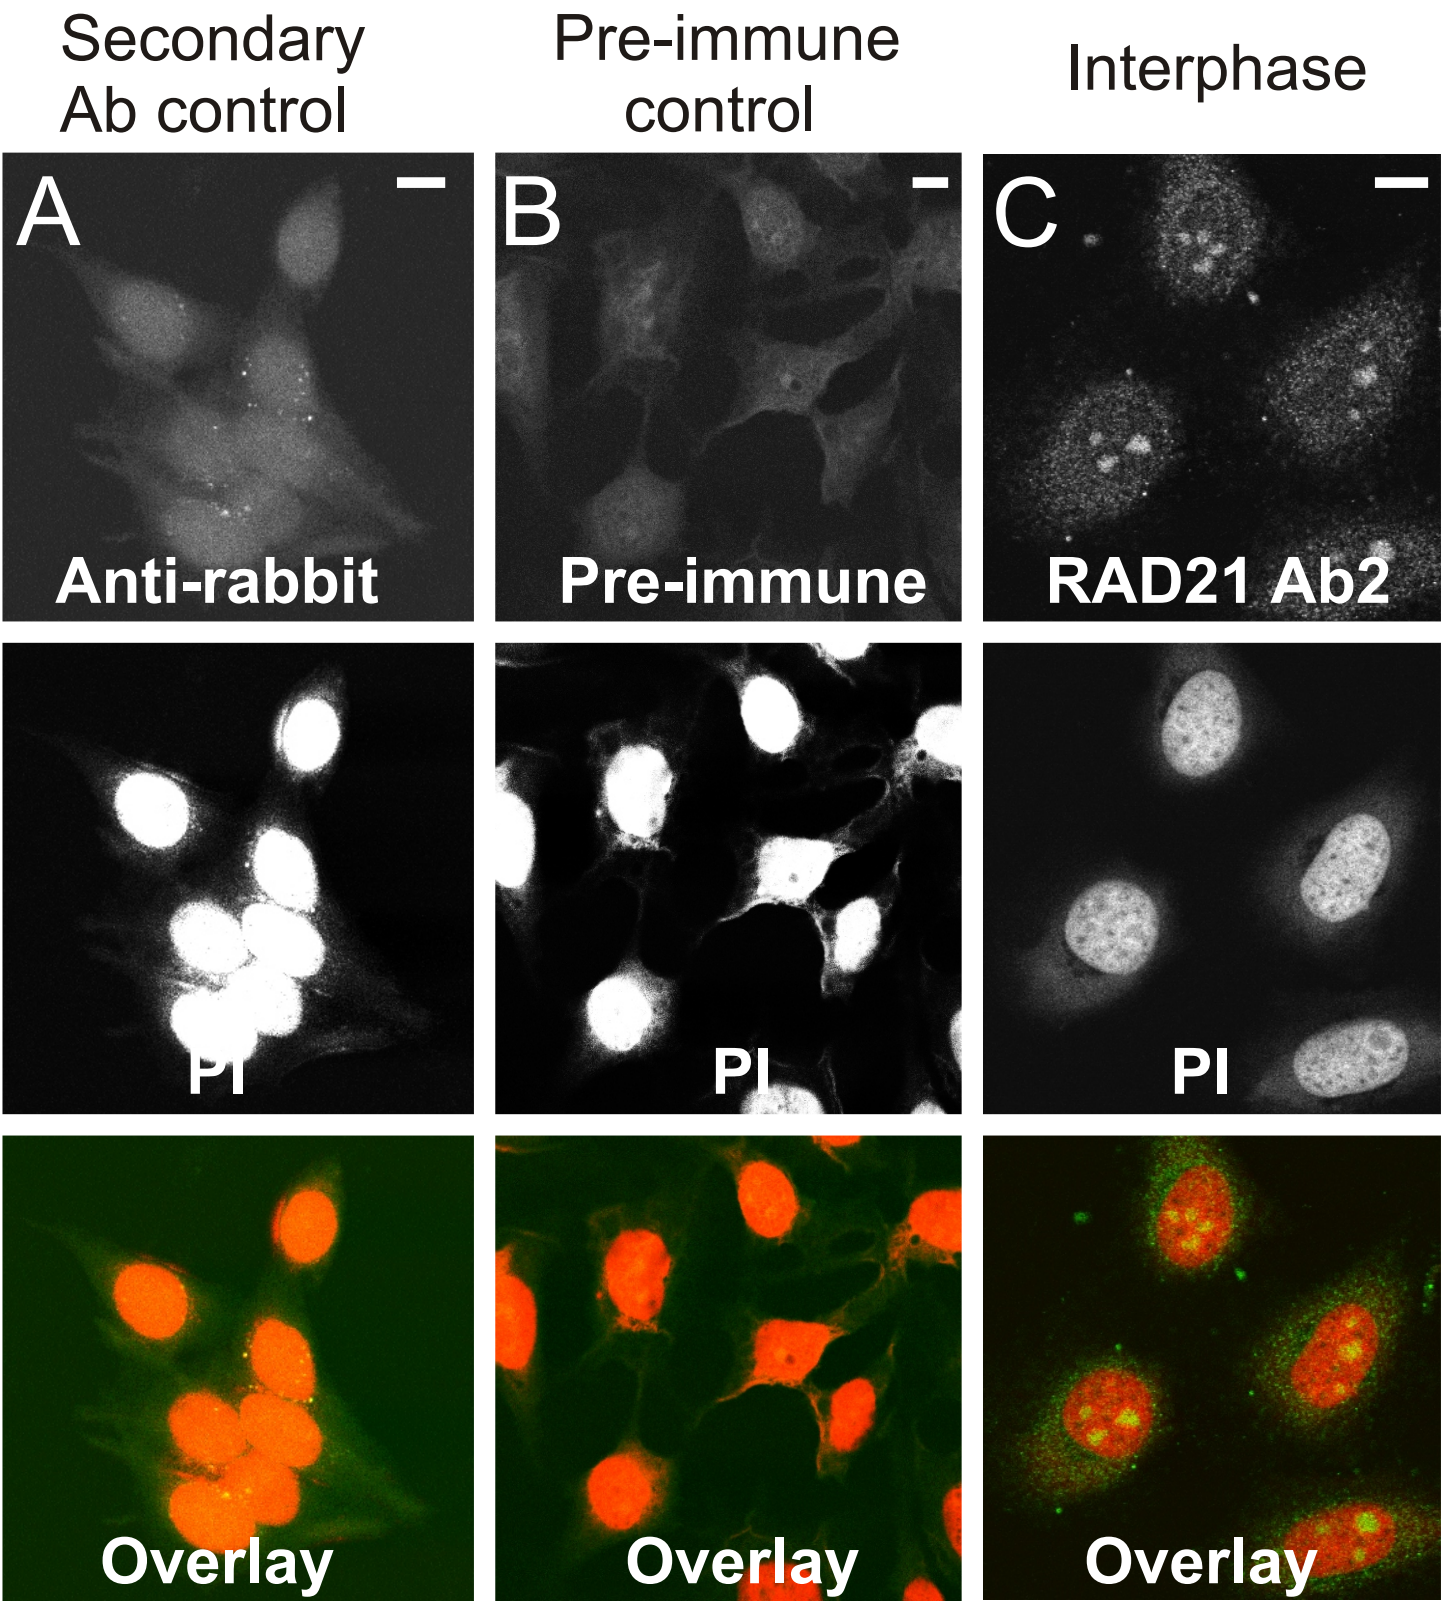

**Supplementary Fig. 4** | Immunostaining of HeLa cells using RAD21 Ab2. Nucleus was counter-stained with PI (red). Controls were performed by omitting primary antibody (**A**) and by using pre-immune sera (**B**). The staining of RAD21 Ab2 (green) was examined in interphase (**C**), note the intensive staining in nucleoli. Bar = 10  $\mu$ m.
