# Supplementary material
Source: PubMed Central journal article supplement (PMC1299032)
Supplement: 5-7400121s6.pdf [file 5-7400121s6.pdf]

# Supplementary Figure 6

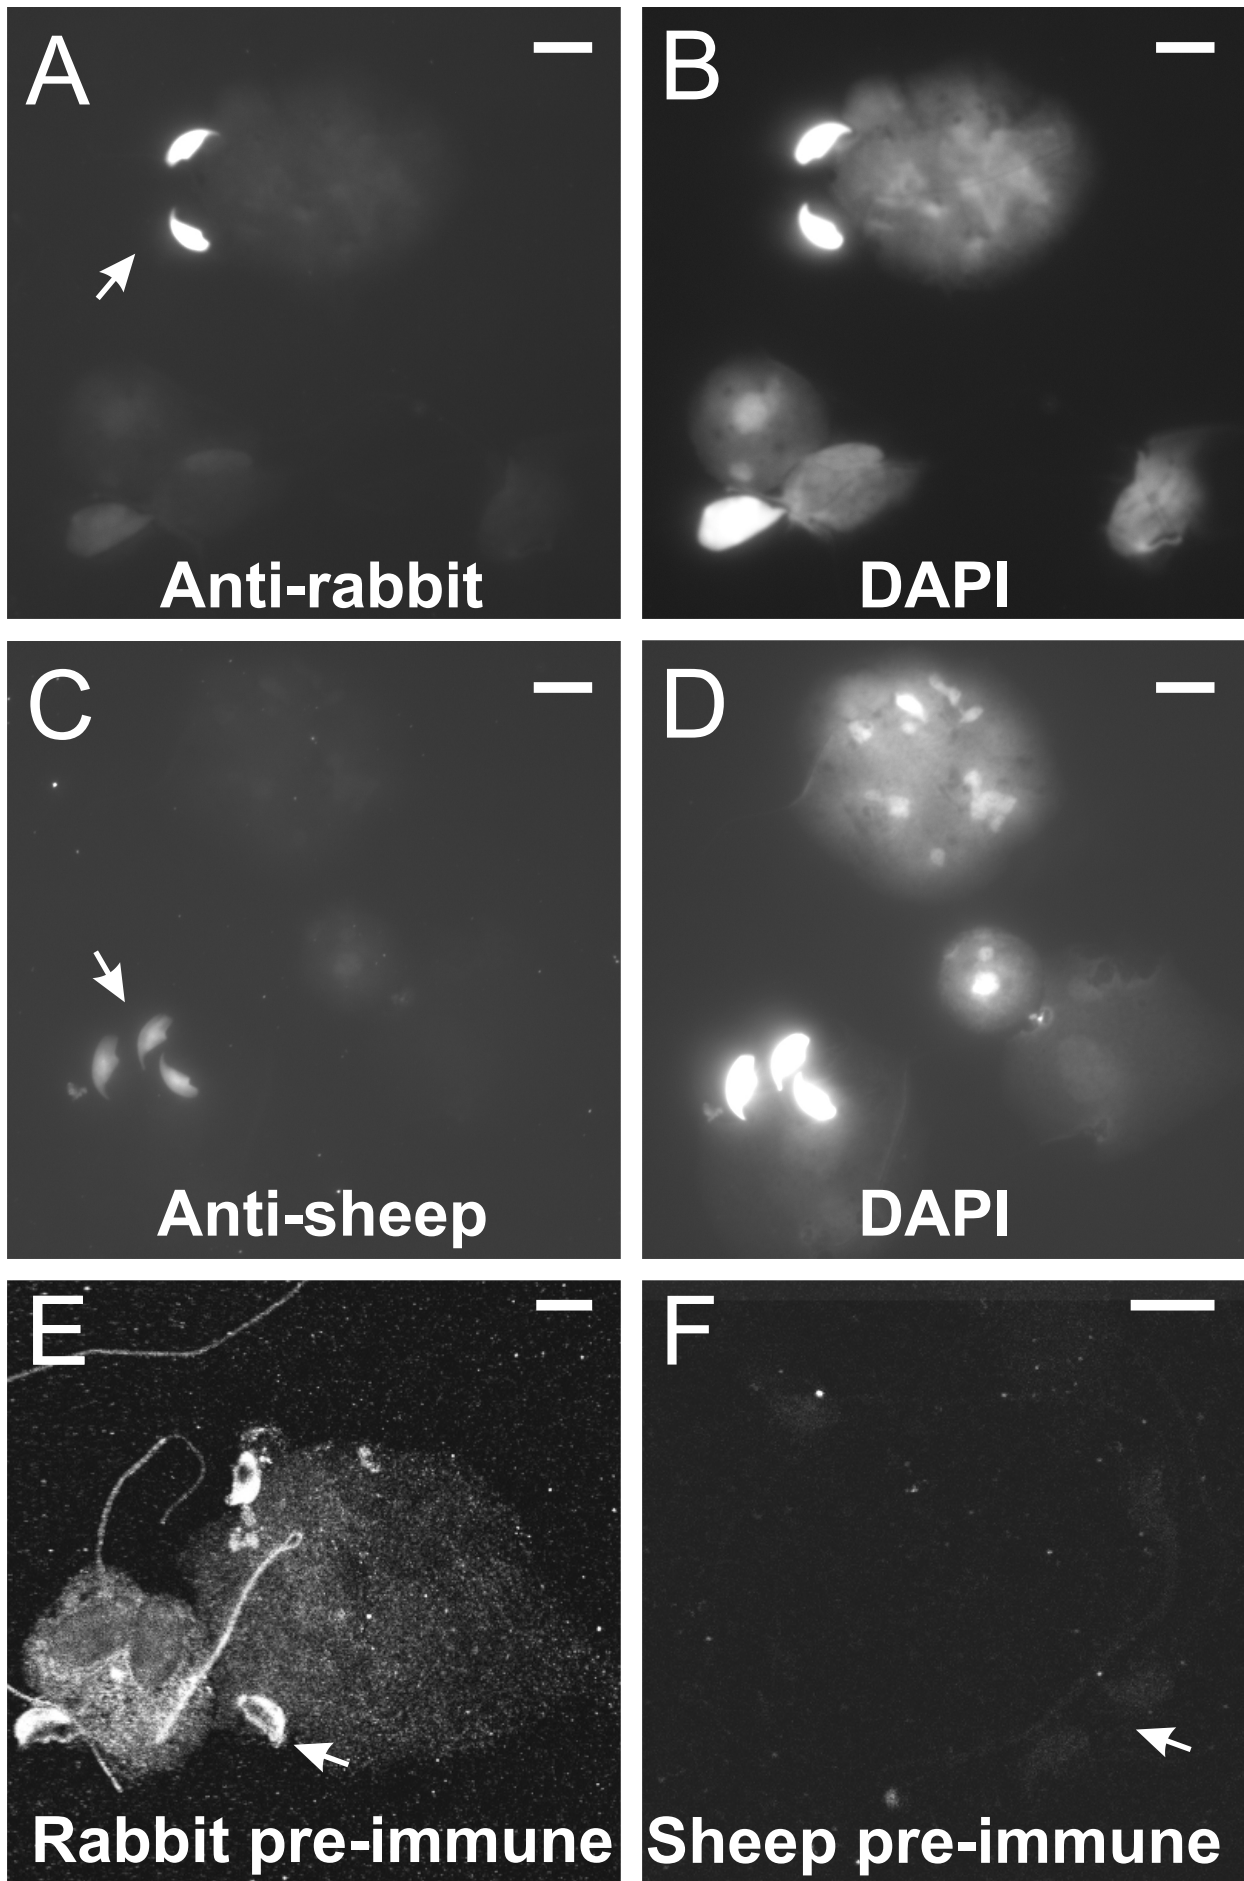

**Supplementary Fig. 6** | Controls for immunostaining of spermatocyte chromosome spreads. **(A–D)** Both rabbit and sheep RAD21/SCC1 primary antibodies were omitted to test for cross-reactivities of the secondary antibodies. Staining was only detected in sperm (arrow) for both anti-rabbit **(A)** and anti-sheep **(C)** secondary antibodies. Cells were counter-stained with DAPI **(B, D)**. **(E)** Cells stained with rabbit pre-immune serum. Note the staining of sperm due to cross-reactivity. **(F)** Cells stained with sheep pre-immune serum. Bar = 10  $\mu\text{m}$ .
