# Supplementary material
Source: PubMed Central journal article supplement (PMC1299032)
Supplement: 5-7400121s8.pdf [file 5-7400121s8.pdf]

# Supplementary Figure 8

## RAD21 Ab2

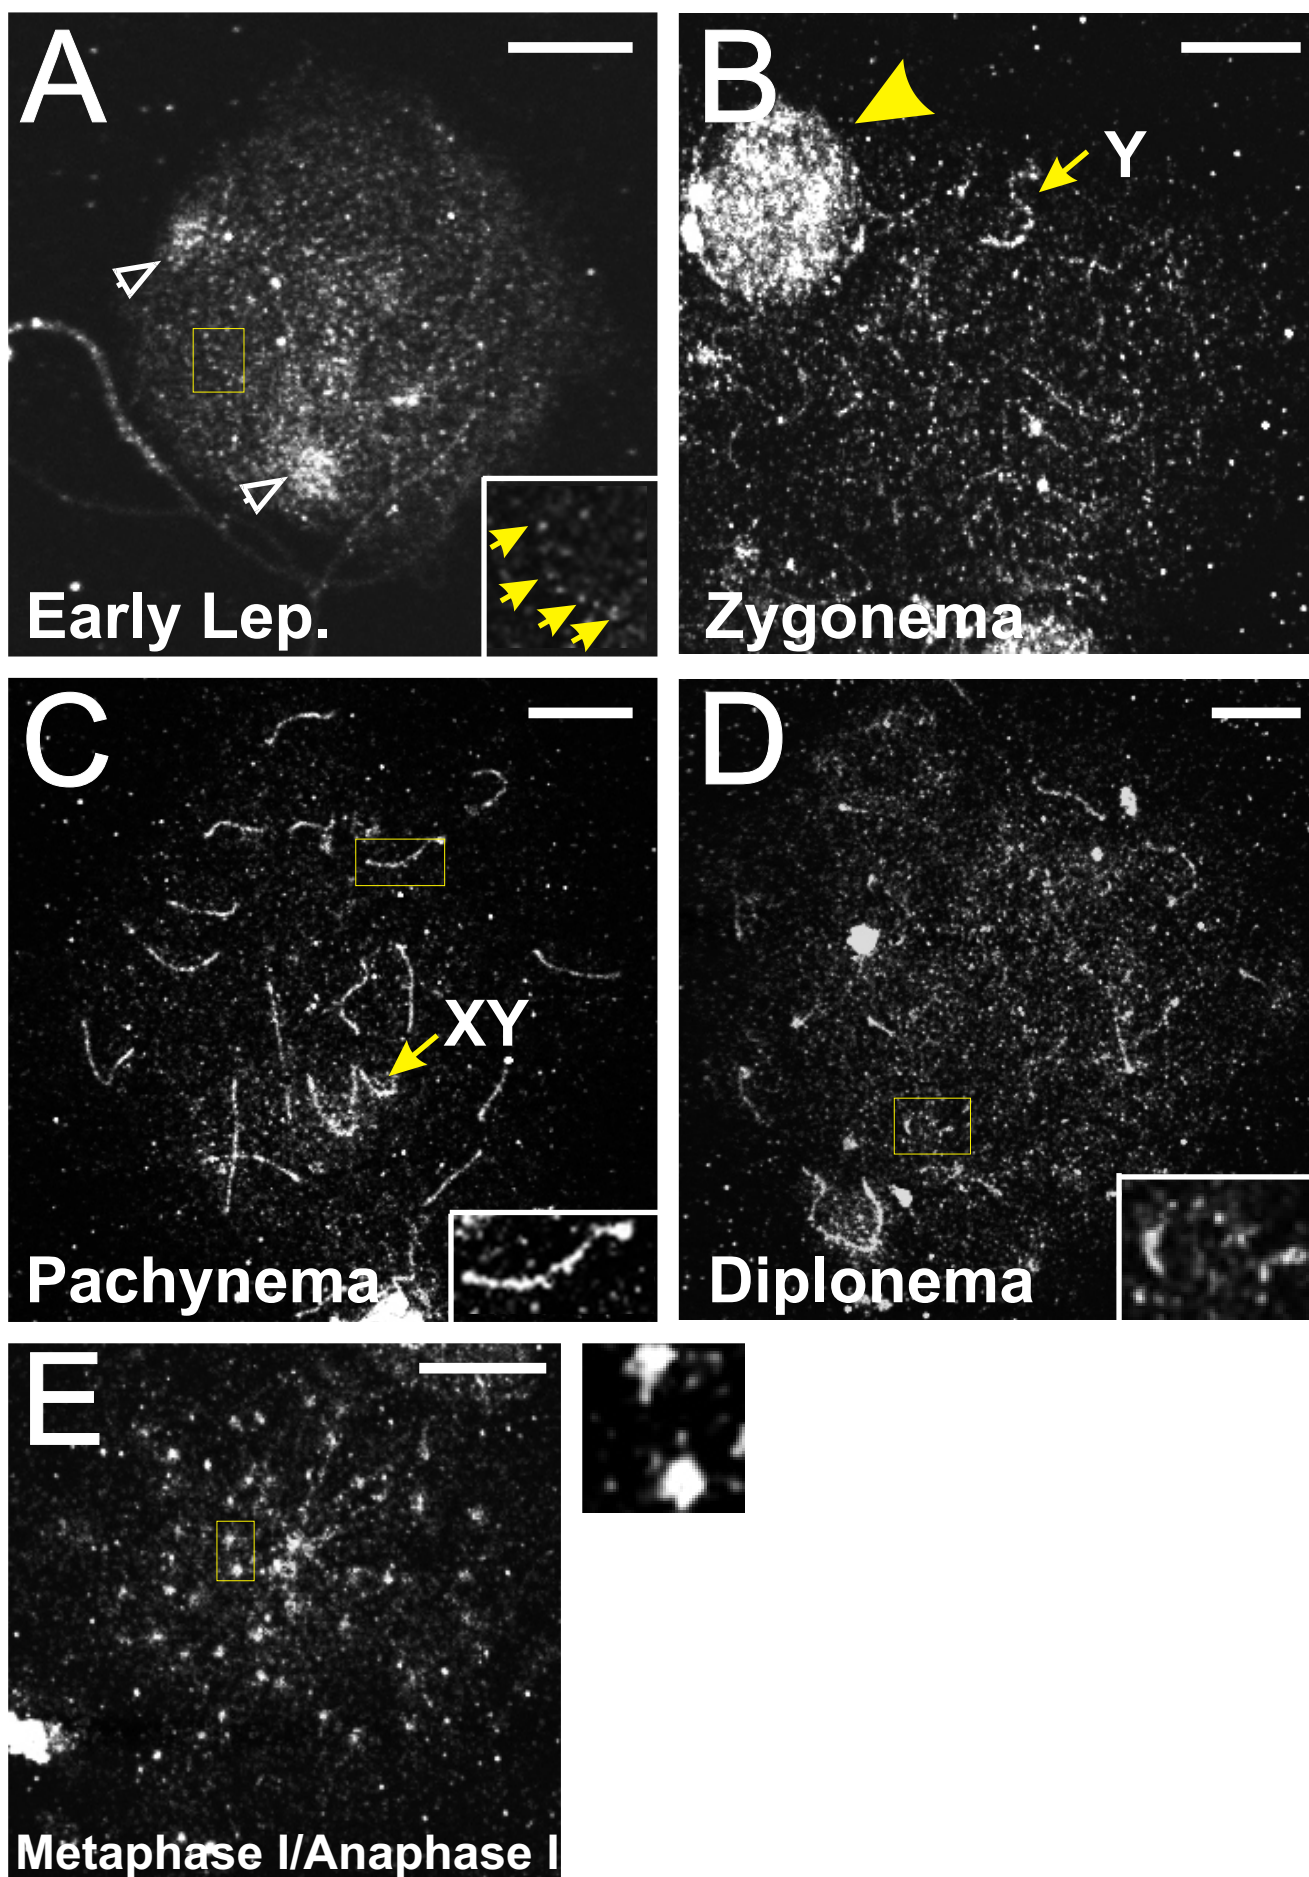

**Supplementary Fig. 8** | Single labelling of spermatocyte chromosome spreads using RAD21 Ab2. **(A)** Early leptotema. Note the typical clusters of centromeres (open arrows). Insert showing a higher magnification of boxed region. Arrows indicate a row of RAD21/SCC1 dots. **(B)** Zygonema. Arrow indicates the Y chromosome. Similar to Ab1, the antibody stained nuclei of a much smaller size than spermatocytes (arrowhead). **(C)** Pachynema. **(D)** Diplonema, with an enlarged view of the boxed chromosomes showing a stronger signal at both ends of de-synapsing homologues. **(E)** Metaphase I/anaphase I. Centromeres of homologues are in the vicinity of each other. A detailed view of selected pair is shown on the left. Bar = 10  $\mu\text{m}$ .
