# Supplementary material
Source: PubMed Central journal article supplement (PMC1299032)
Supplement: 5-7400121s10.pdf [file 5-7400121s10.pdf]

# Supplementary Figure 10

Omitting sheep primary antibody

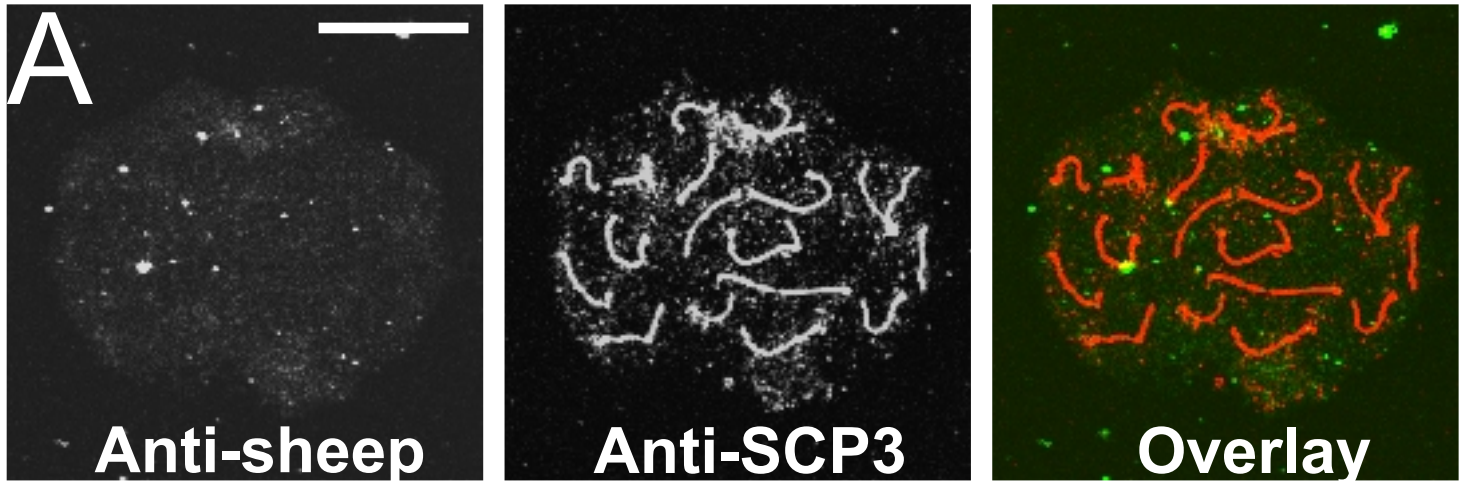

Sheep pre-immune serum

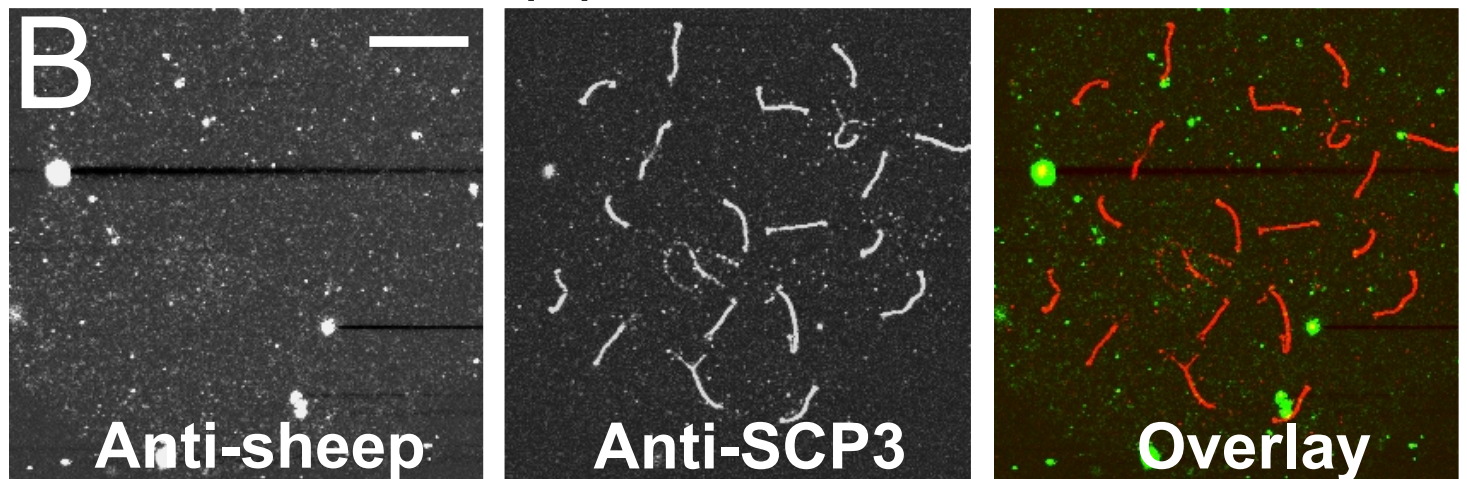

Rabbit anti- H2AX

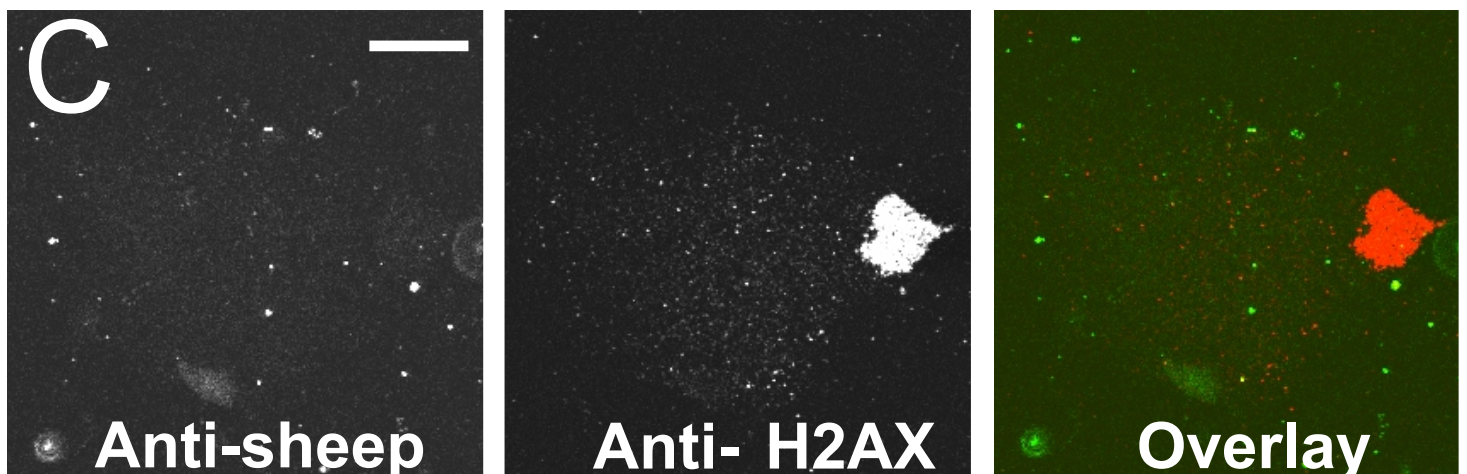

**Supplementary Fig. 10** | Controls for co-immunolabelling of spermatocyte chromosome spreads. Spreads were stained using (A) a rabbit polyclonal antibody to SCP3 but omitting anti-sheep primary antibody, (B) a rabbit polyclonal antibody to SCP3 and pre-immune sheep serum or (C) a rabbit polyclonal antibody to  $\gamma$ H2AX, which stains strongly the XY chromosomes in pachytene spermatocytes. In overlay images, anti-sheep is represented in green, anti-rabbit in red and co-localization in yellow. No cross-reactivity on chromosome cores was observed in any case. Bar = 10  $\mu$ m.
