# Supplementary material
Source: PubMed Central journal article supplement (PMC1299032)
Supplement: 5-7400121s11.pdf [file 5-7400121s11.pdf]

# Supplementary Figure 11

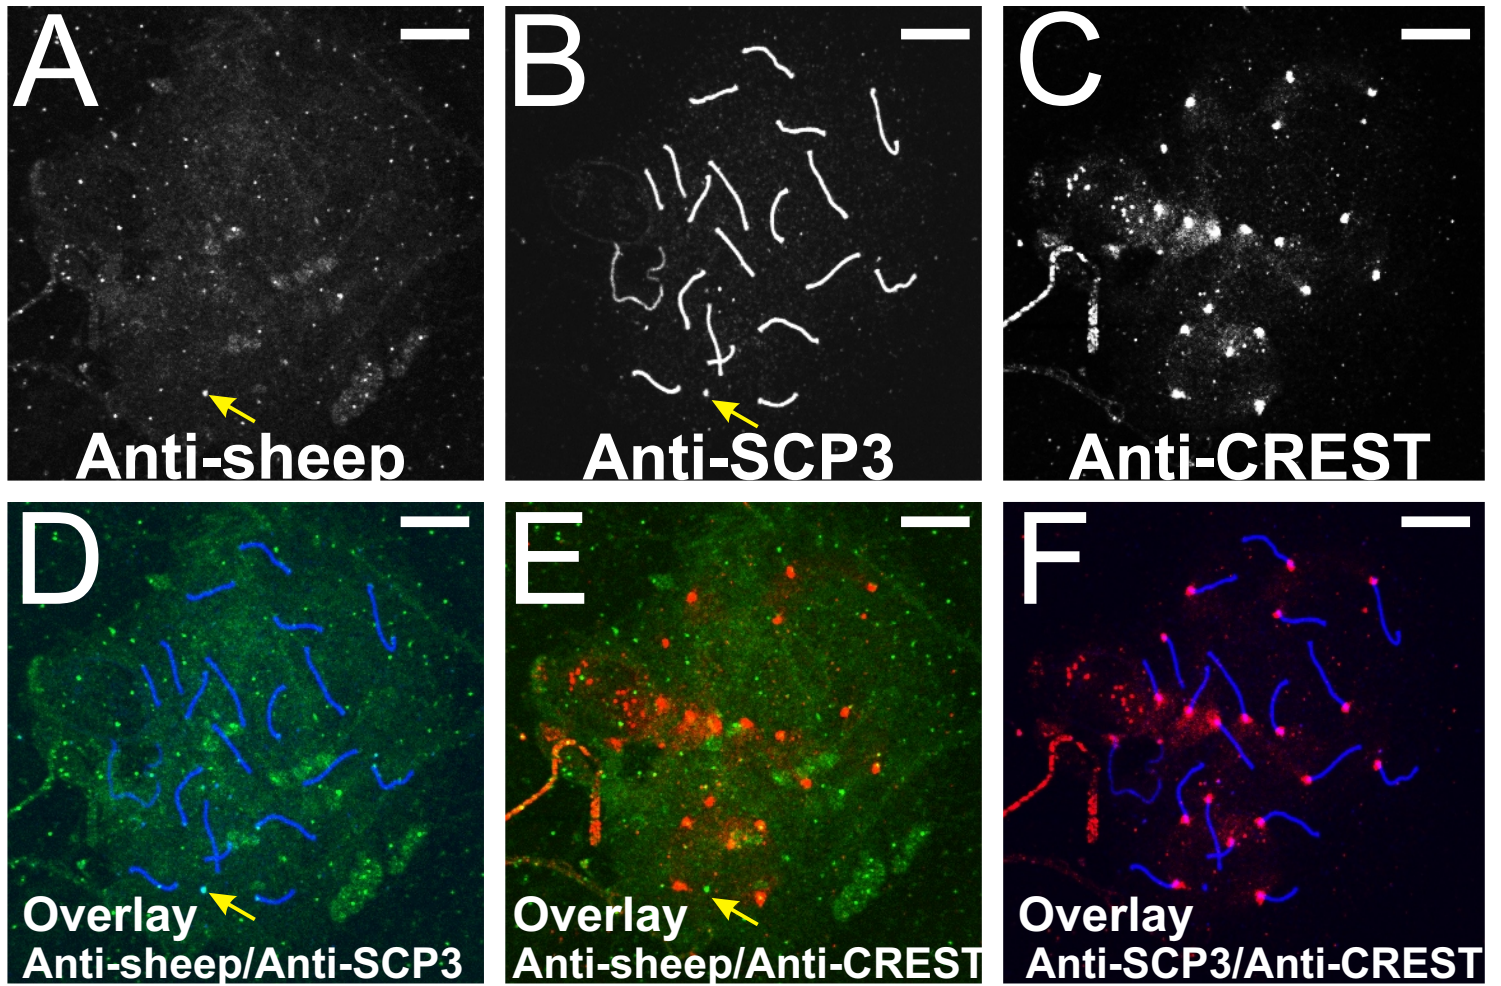

**Supplementary Fig. 11** | Controls for triple-labelling of spermatocyte chromosome spreads. Spreads were co-immunostained with a rabbit polyclonal antibody to SCP3 and human CREST-6 sera but no anti-sheep primary antibody. Signal detected by each secondary antibody was shown in black and white as follows: **(A)** anti-sheep; **(B)** anti-rabbit; **(C)** anti-human IgG. In overlay images **(D–F)**, anti-sheep is represented in green, anti-rabbit in purple and anti-human IgG in red. Arrow points to a background spot. Bar = 10  $\mu\text{m}$ .
